# Supplementary material
Source: PubMed Central journal article supplement (PMC5496786)

# Supplement Figure 1

NSAID challenge and desensitization protocols

## ***Scripps Clinic***

*Day 1*

Ketorolac Challenge

- 1.26 mg ketorolac, 1 spray in 1 nostril. Wait 30 minutes.
- 2.53 mg ketorolac, 1 spray in each nostril. Wait 30 minutes.
- 5.05 mg ketorolac, 2 sprays in each nostril. Wait 30 minutes.
- 7.58 mg ketorolac, 3 sprays in each nostril. Wait 60 minutes.

Aspirin Challenge/Desensitization

- Aspirin 81 mg. Wait 90 minutes.
- Aspirin 81 mg. Wait 90 minutes. If stable, discharge for day.

*Day 2*

- Aspirin 325 mg. Wait 3 hours. End of desensitization.

## ***UCSD***

*Day 1*

Ketorolac Challenge

- 1.26 mg ketorolac, 1 spray in 1 nostril. Wait 30 minutes.
- 2.53 mg ketorolac, 1 spray in each nostril. Wait 30 minutes.
- 5.05 mg ketorolac, 2 sprays in each nostril. Wait 30 minutes.
- 7.58 mg ketorolac, 3 sprays in each nostril. Wait 60 minutes.

Aspirin Challenge/Desensitization

- Aspirin 40.5 mg. Wait 90 minutes.
- Aspirin 40.5 mg. Wait 90 minutes. If stable, discharge for day.

*Day 2*

- Aspirin 81 mg. Wait 3 hours.
- Aspirin 162 mg. Wait 3 hours
- Aspirin 325 mg. Wait 3 hours. If stable, discharge for day

*Day 3*

- Aspirin 650 mg. Wait 3 hours. End of desensitization.

# Supplement Figure 2

## Modified AERD Symptom Score

### Scale

0= no symptom

1= mild, barely noticeable symptoms

2= moderate, somewhat troublesome symptoms

3= symptoms are much worse than you generally experience or are making you very uncomfortable

### Symptoms Assessed

Nasal congestion

Runny nose

Sneezing

Itchy nose

Itchy/watery eyes

Tight throat

Wheezing

Chest tightness

# Supplement Figure 3

## A. Nasal polyp ILC2 gating

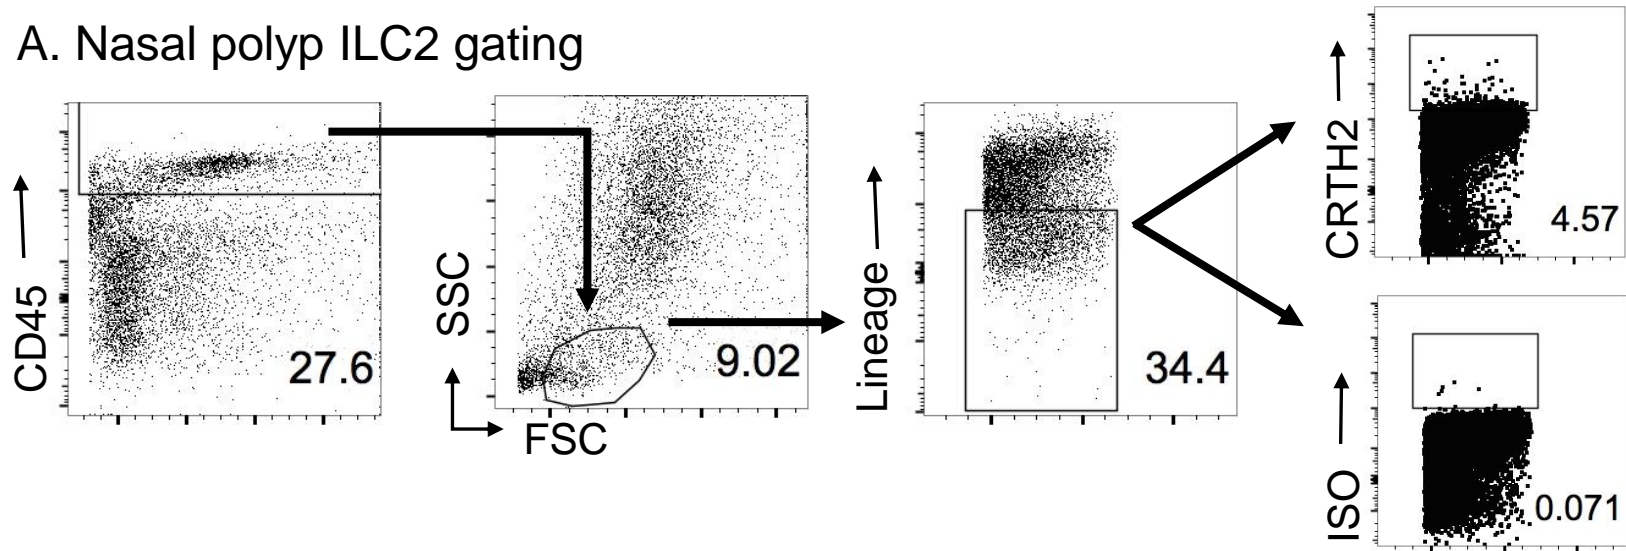

## B. Nasal polyp GATA 3 gating

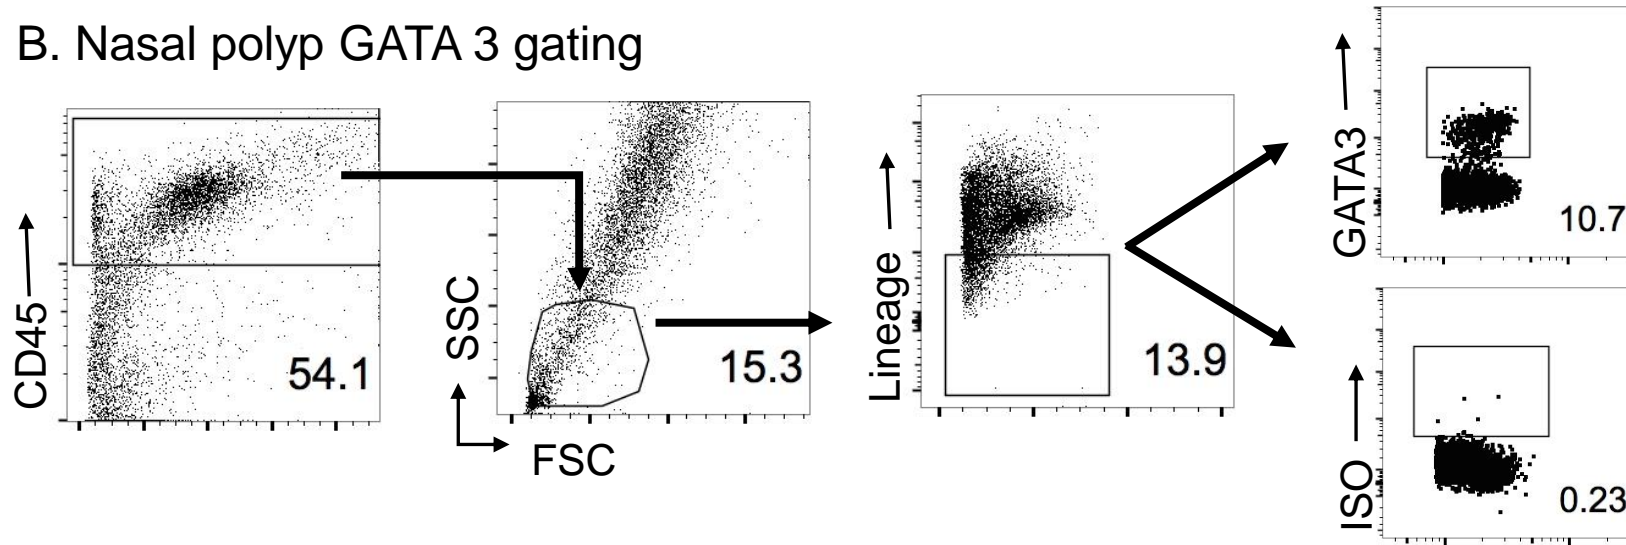

Supplement: NIHMS839414-supplement-01.pdf [file NIHMS839414-supplement-01.pdf]
